# Supplementary material for: Access to chiral α-bromo and α-H-substituted tertiary allylic alcohols via copper(i) catalyzed 1,2-addition of Grignard reagents to enones
Source: Royal Society of Chemistry journal article supplement (doi:10.1039/c2ob25080b), 2012-01-01

## SUPPORTING INFORMATION I

### Access to Chiral $\alpha$ -Bromo and $\alpha$ -H-Substituted Tertiary Allylic Alcohols via Copper(I) Catalyzed 1,2-Addition of Grignard Reagents to Enones

Ashoka V. R. Madduri, Adriaan J. Minnaard,\* Syuzanna R. Harutyunyan\*

Stratingh Institute for Chemistry, University of Groningen, Nijenborgh 4, 9747 AG, Groningen, The Netherlands

#### General Information

Flash chromatography: Merck silica gel type 9385 230-400 mesh, TLC: Merck silica gel 60, 0.25 mm. Components were visualized by UV and Seebach's reagent, a mixture of phosphomolybdic acid (25 g), cerium (IV) sulfate (7.5 g), H<sub>2</sub>O (500 mL) and H<sub>2</sub>SO<sub>4</sub> (25 mL) or potassium permanganate staining. Progress and conversion of the reaction were determined by GC-MS (GC, HP6890; MS HP5973) with an HP1 or HP5 column (Agilent Technologies, Palo Alto, CA). High resolution mass spectra (HRMS) were recorded on a AEI-MS-902 and FTMS orbitrap (Thermo Fisher Scientific) mass spectrometer. <sup>1</sup>H- and <sup>13</sup>C-NMR were recorded on a Varian AMX400 (400 and 100.59 MHz, respectively) or a Varian Gemini 200, using CDCl<sub>3</sub> as solvent. Chemical shift values are reported in ppm with the solvent resonance as the internal standard (CHCl<sub>3</sub>:  $\delta$  7.26 for <sup>1</sup>H,  $\delta$  77.0 for <sup>13</sup>C). Data are reported as follows: chemical shifts, multiplicity (s = singlet, d = doublet, t = triplet, q = quartet, br = broad, m = multiplet), coupling constants (Hz), and integration. Carbon assignments are based on APT <sup>13</sup>C-NMR experiments. Optical rotations were measured on a *Schmidt + Haensch* polarimeter (Polartronic MH8) with a 10 cm cell (*c* given in g/100 mL). Enantiomeric excesses were determined by HPLC analysis using a Shimadzu LC-10ADVP HPLC equipped with a Shimadzu SPD-M10AVP diode array detector or by capillary GC analysis (HP 6890, CP-Chiralsil-Dex-CB column (25 m x 0.25 mm) or ChiralDEX B-PM (30 m x 0.25 mm x 0.25  $\mu$ m)) using a flame ionization detector.

All reactions were carried out under a nitrogen atmosphere using oven dried glassware and using standard Schlenk techniques. *t*BuOMe and dichloromethane were dried and distilled from calcium hydride; toluene, THF and *n*-hexane were dried and distilled from sodium. All copper salts were

purchased from Aldrich, and used without further purification. Starting materials were prepared following literature procedures.<sup>1,2</sup> Grignard reagents were purchased from Aldrich (*i*BuMgBr (2 M in Et<sub>2</sub>O), EtMgBr (3 M in Et<sub>2</sub>O). Ligands **L1-L6** were purchased from Aldrich. Racemic products were synthesized by reaction of the  $\alpha,\beta$ -unsaturated ketones (**1-3**) and the corresponding Grignard reagent at rt in Et<sub>2</sub>O. All Grignard reagents were prepared from the corresponding alkyl bromides and Mg activated with I<sub>2</sub> in Et<sub>2</sub>O. Absolute configurations of products were not determined.

#### **Formation of a single copper complex:**

The copper based catalyst employed in the reactions was normally prepared in situ by mixing **L5** with CuBr·SMe<sub>2</sub> in 1.1:1 ratio. Formation of a single copper complex was anticipated upon mixing both reagents. This was supported by both <sup>1</sup>H and <sup>31</sup>P NMR spectroscopy upon mixing **L5** and CuBr·SMe<sub>2</sub> in 1:1 ratio. NMR spectra showed complete disappearance of the signals corresponding to the free ligand **L5** and appearance of a new set of signals corresponding to the copper complex of **L5**.

## NMR spectra of all new compounds

### <sup>1</sup>H NMR

---

<sup>1</sup> Lu, S-M., Bolm, C. *Angew. Chem., Int. Ed.* **2008**, *47*, 8920.

<sup>2</sup> Moser, R., Boskovic, Z. V., Crowe, C. S., Lipshutz, B. H. *J. Am. Chem. Soc.* **2010**, *132*, 7852.

$^{13}\text{C}$  NMR

APT

HMQC

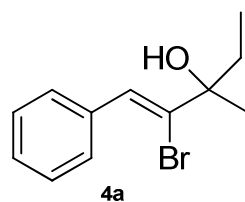

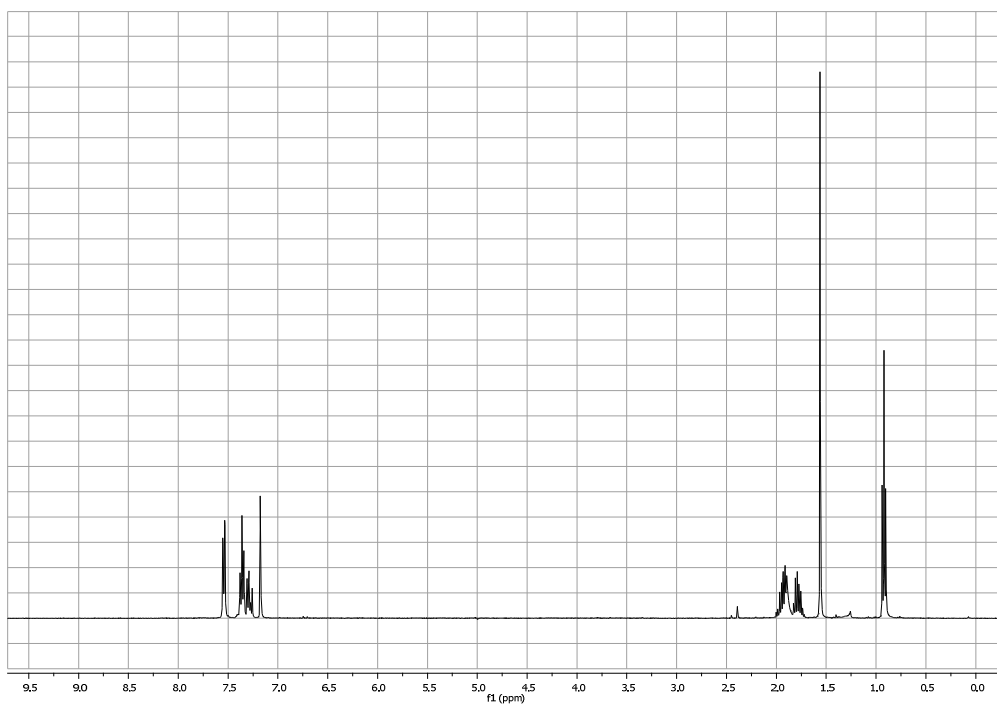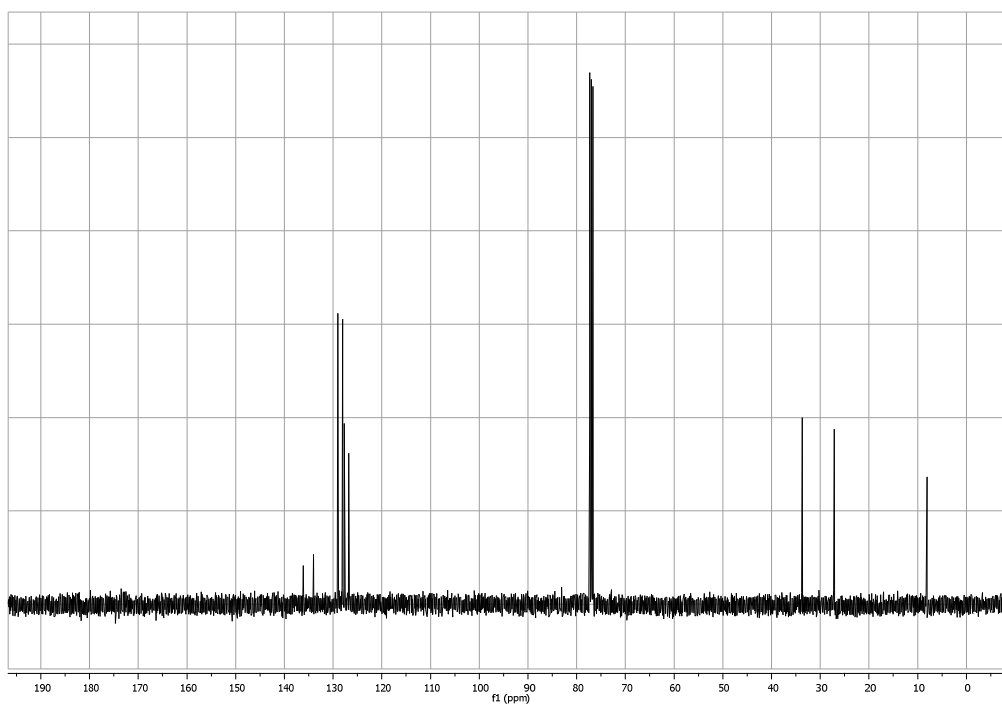

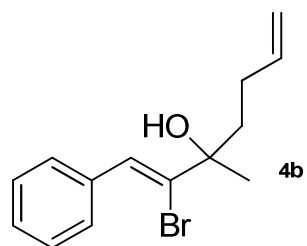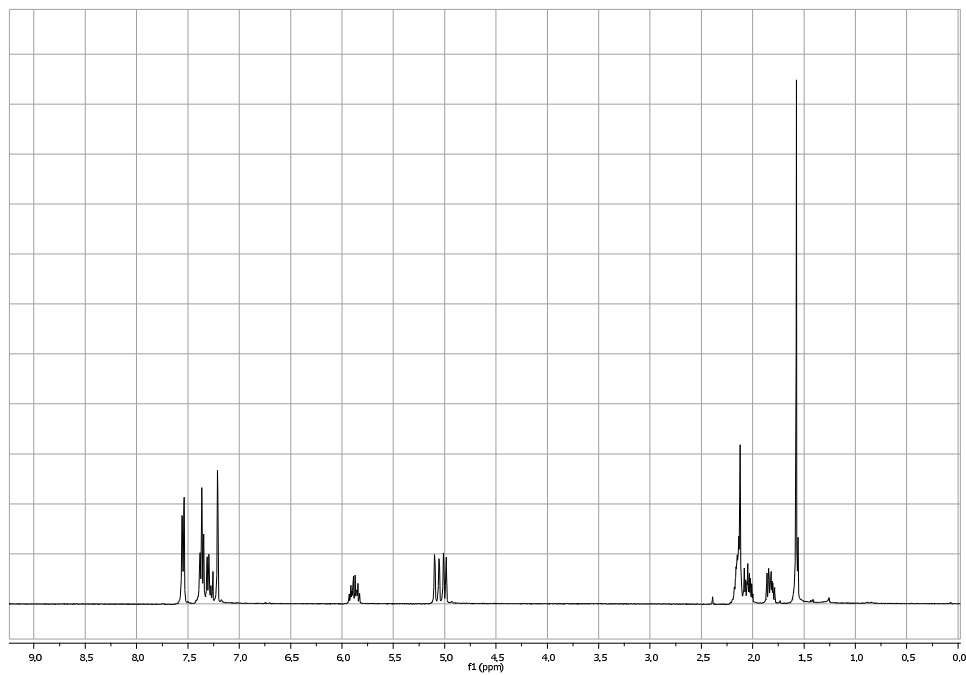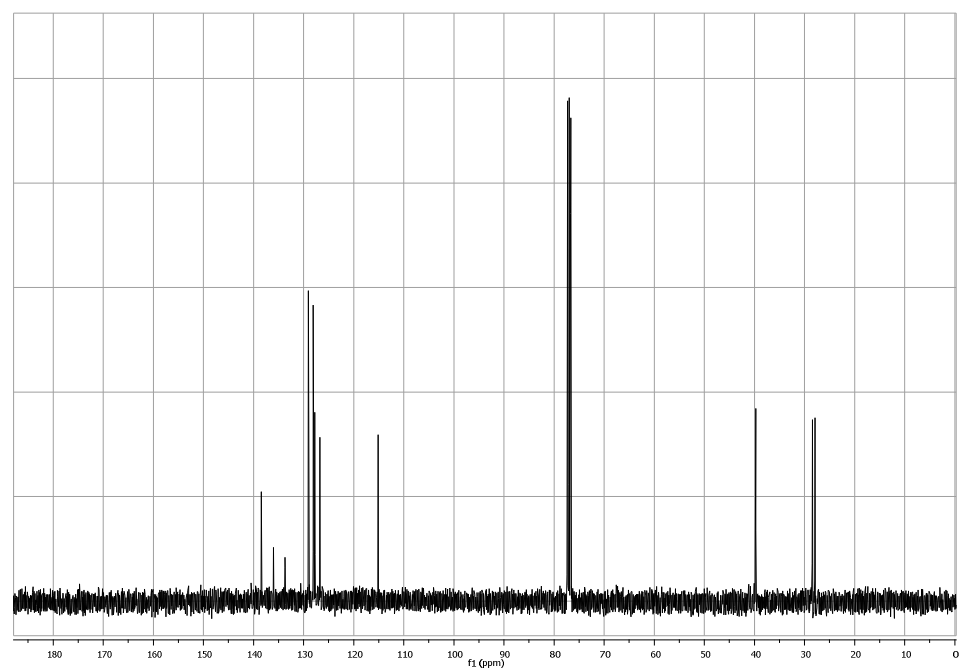

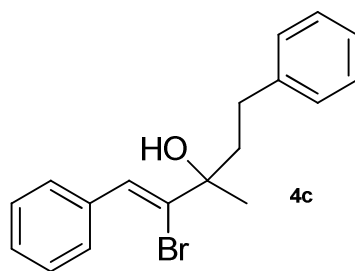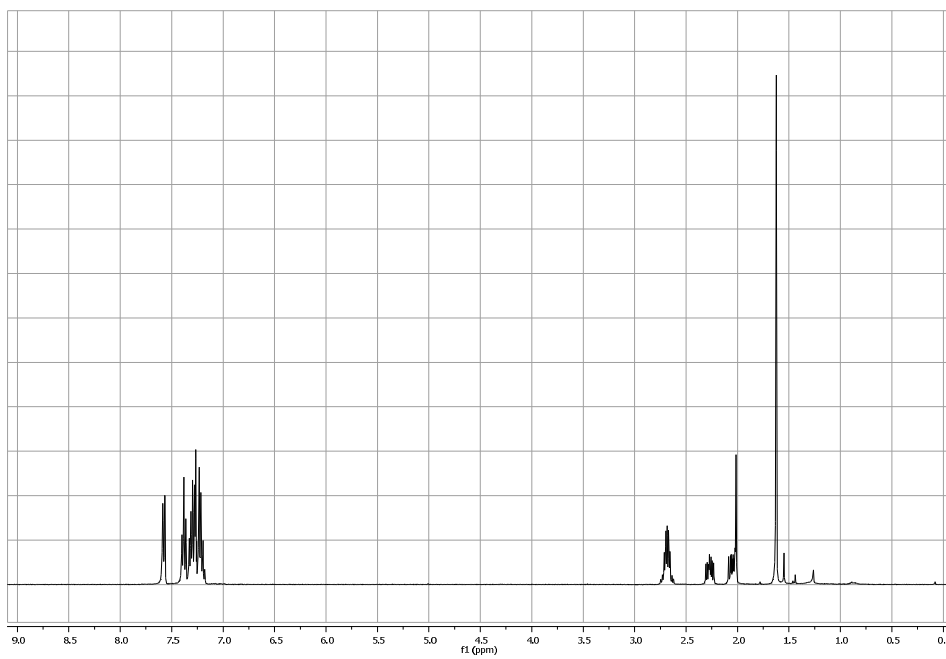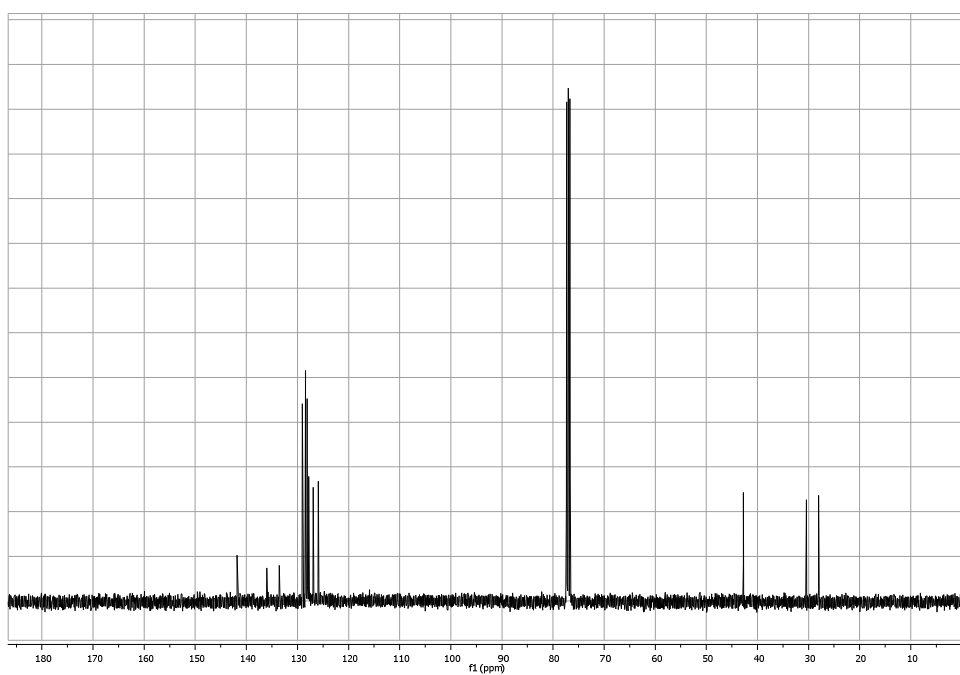

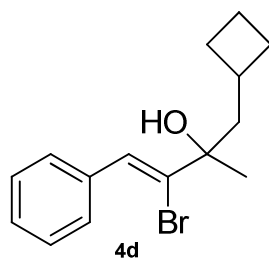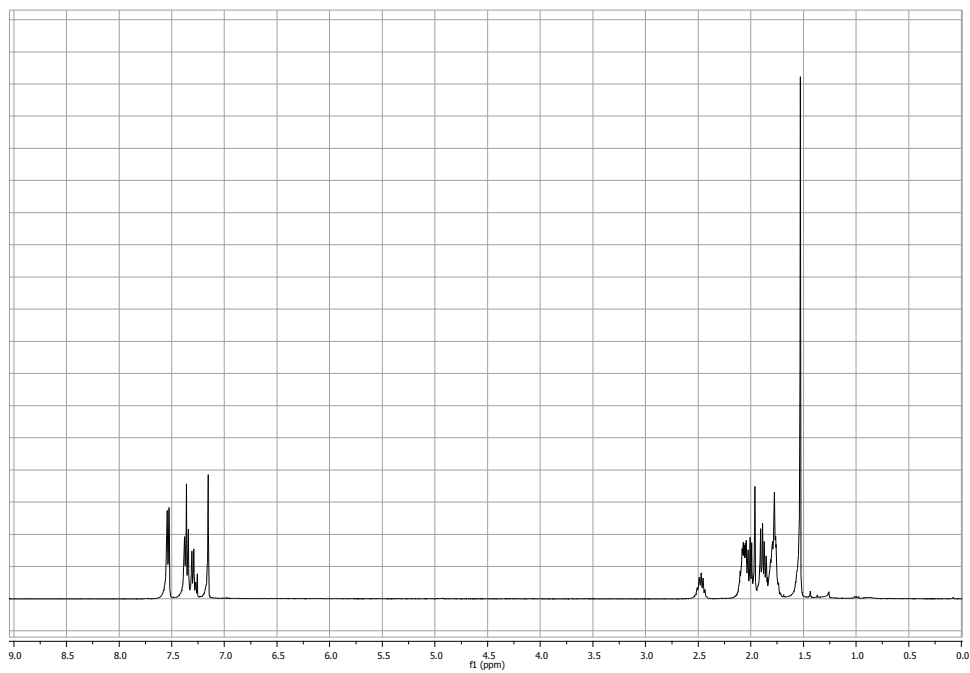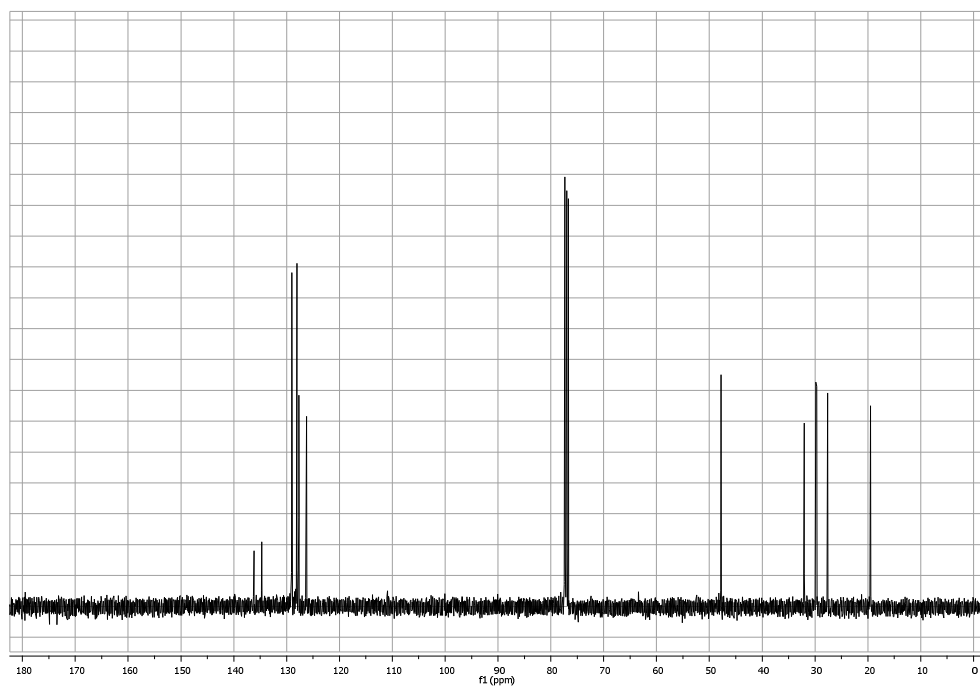

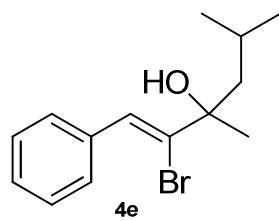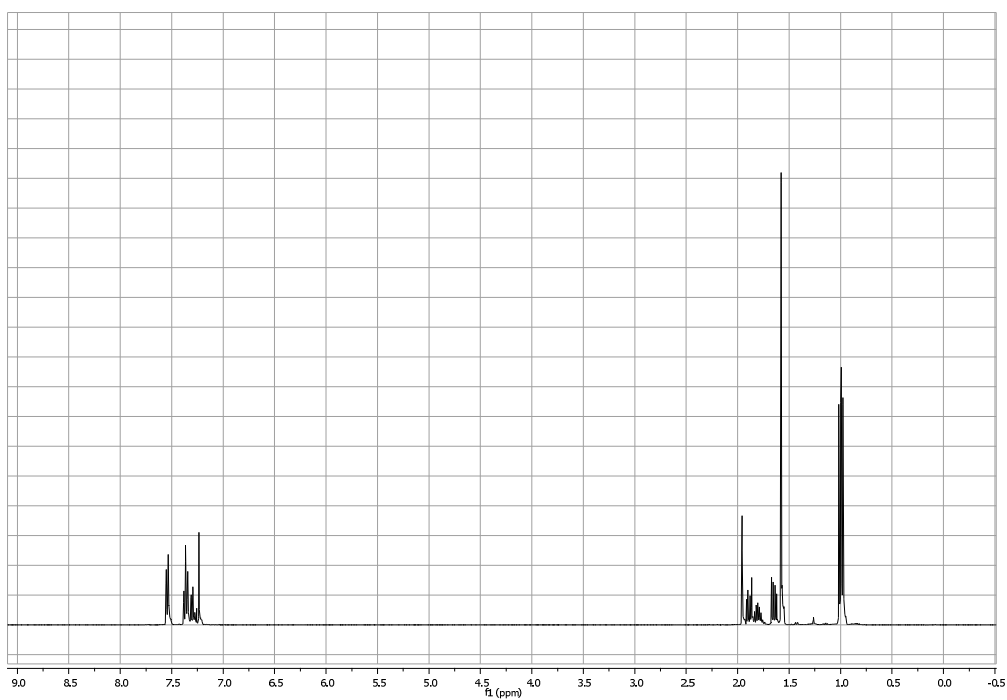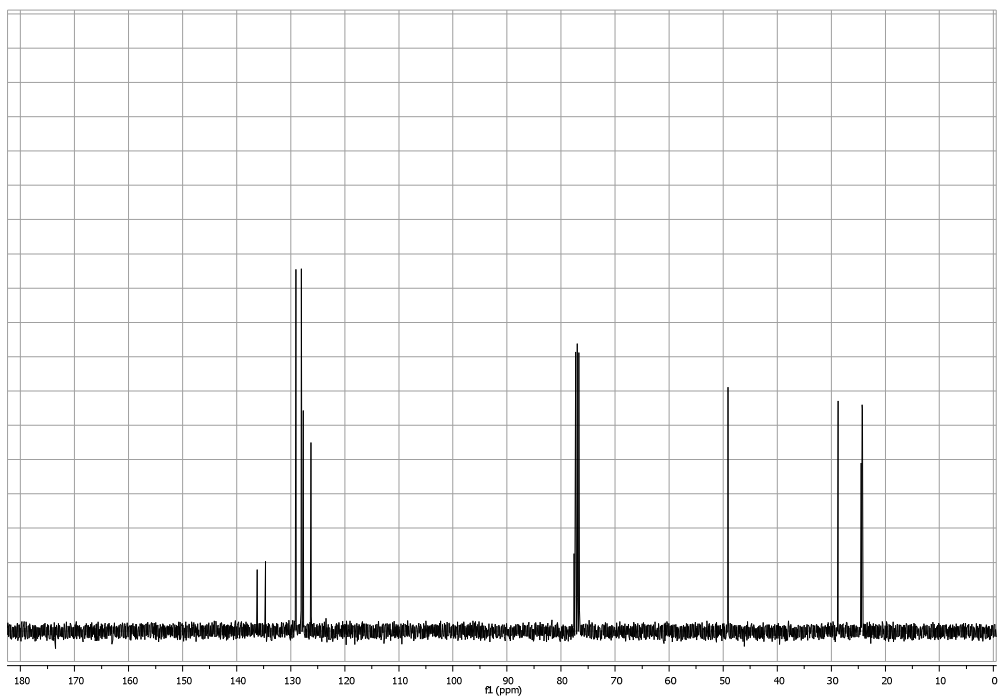



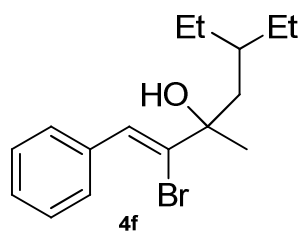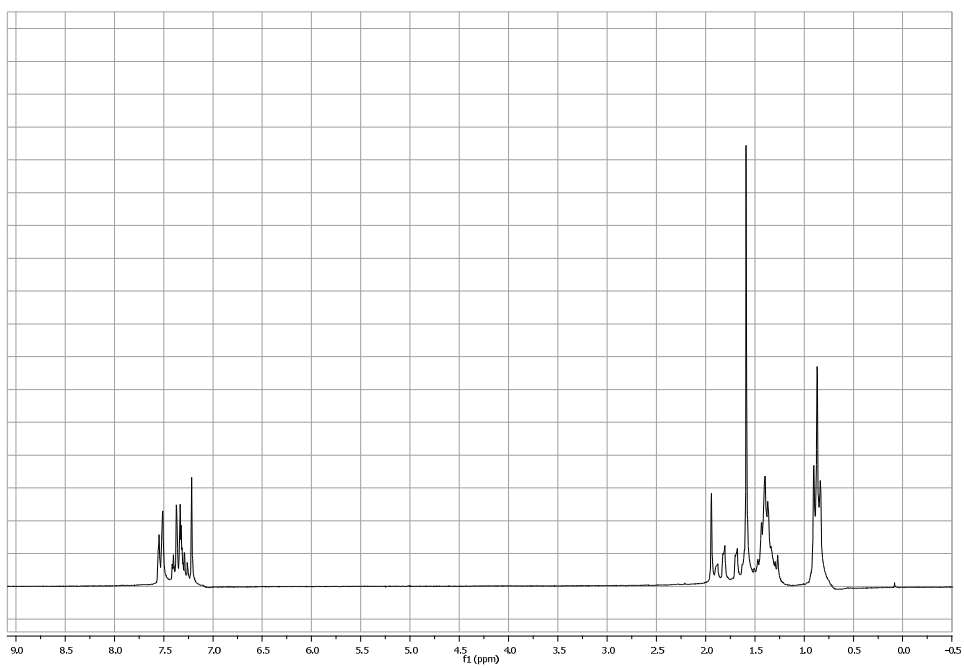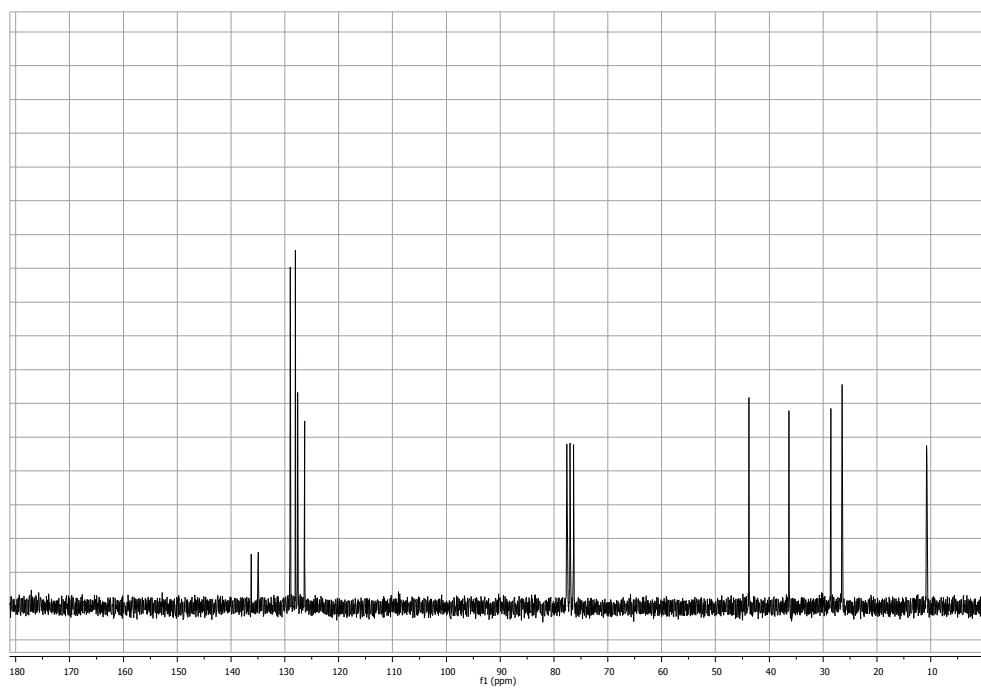

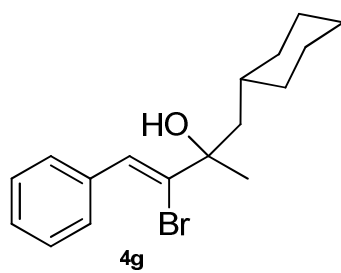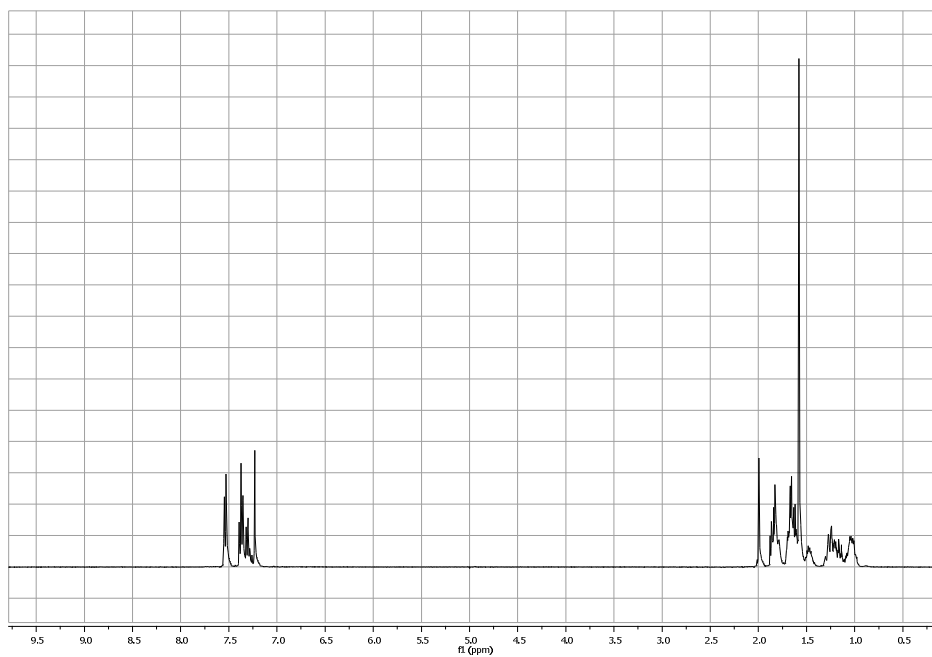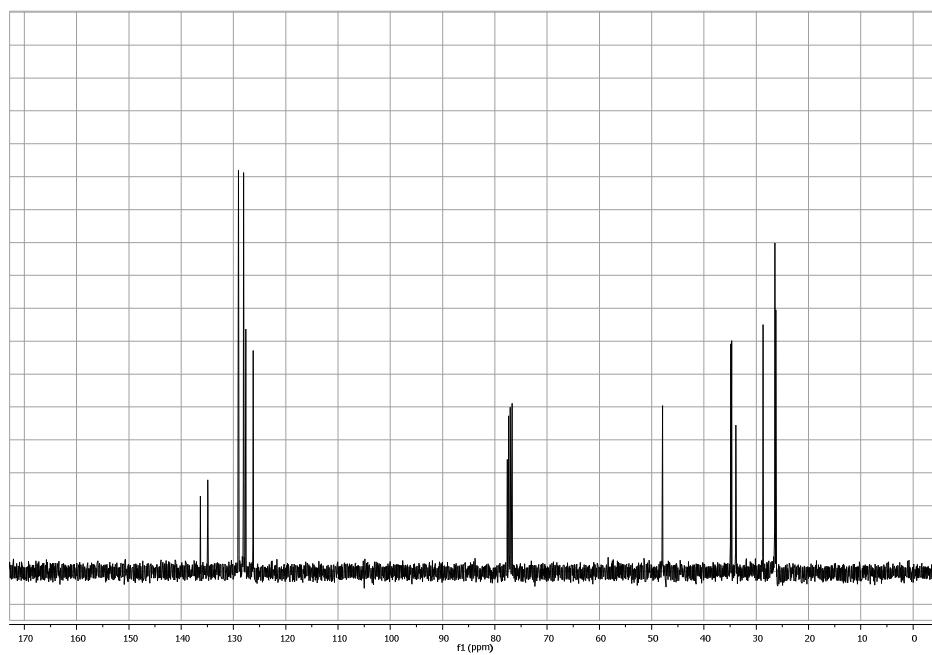

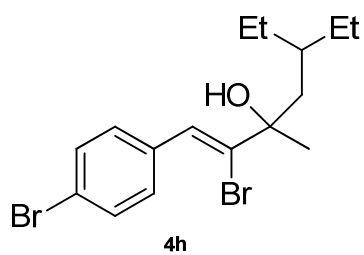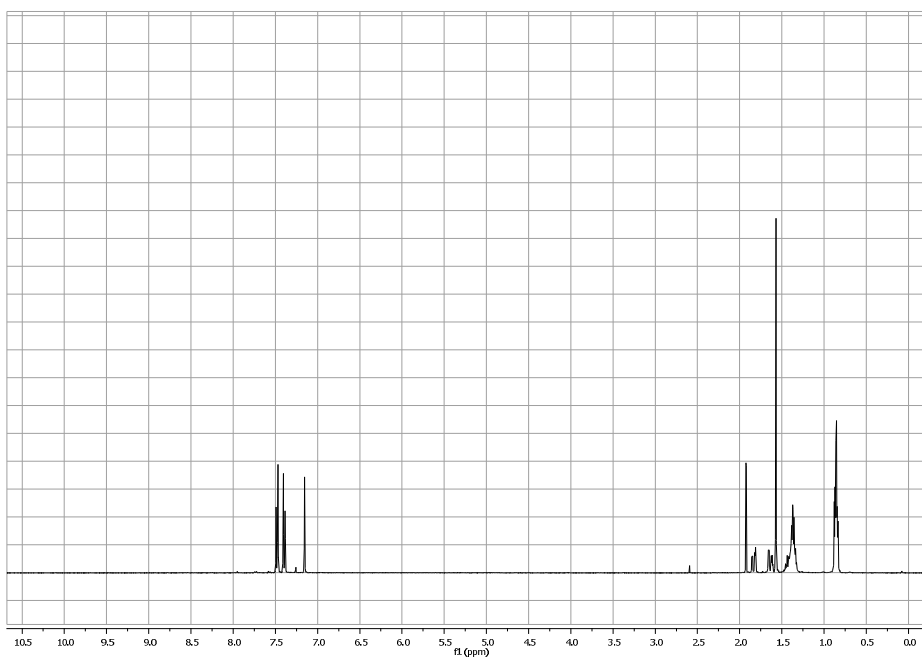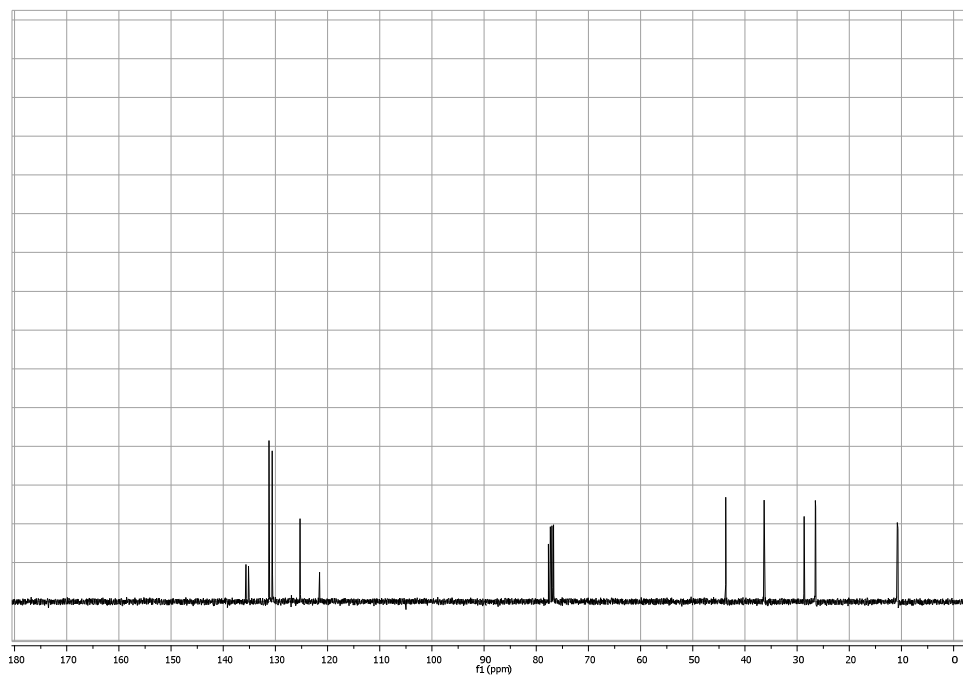

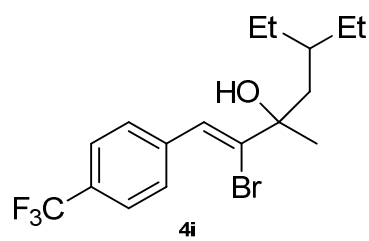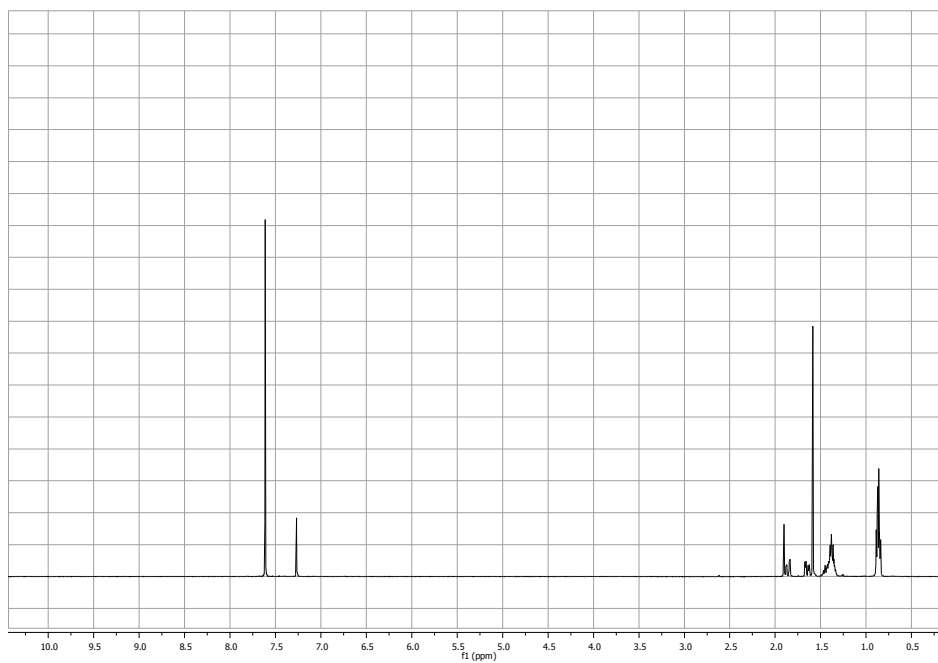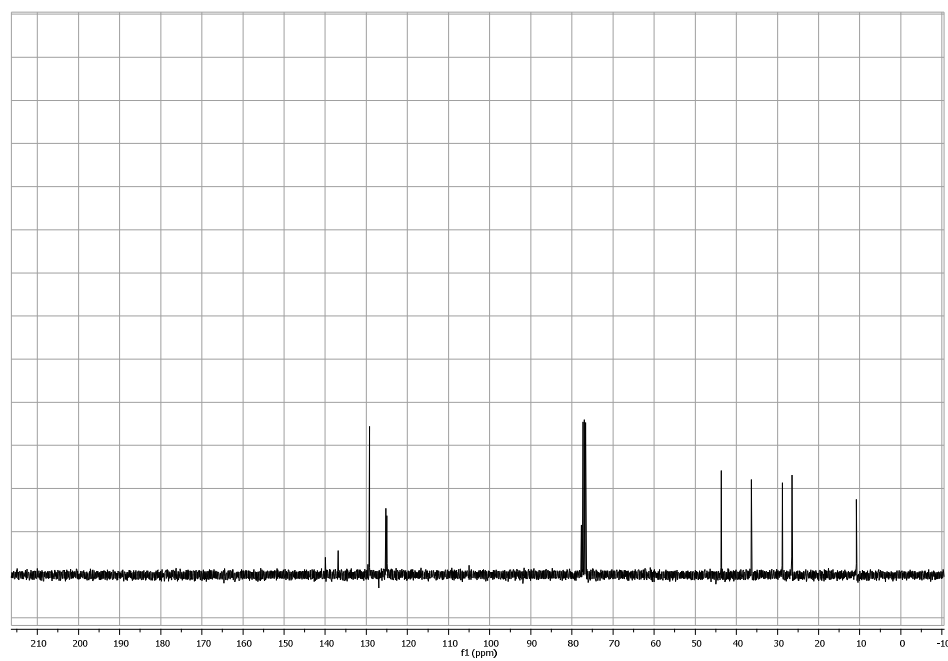

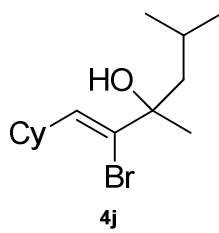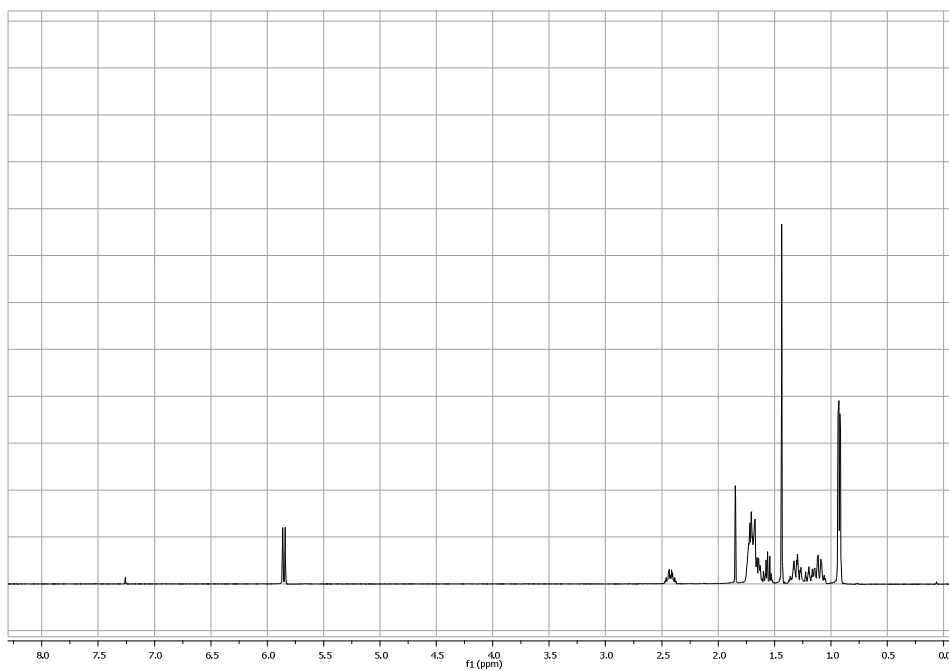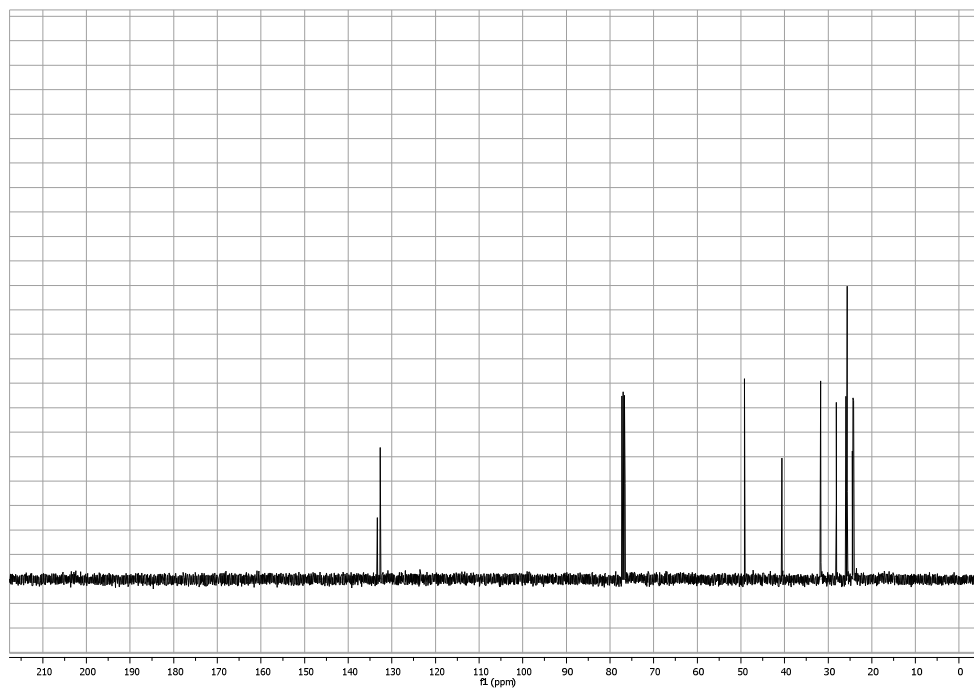

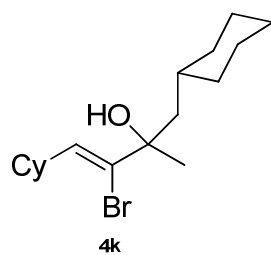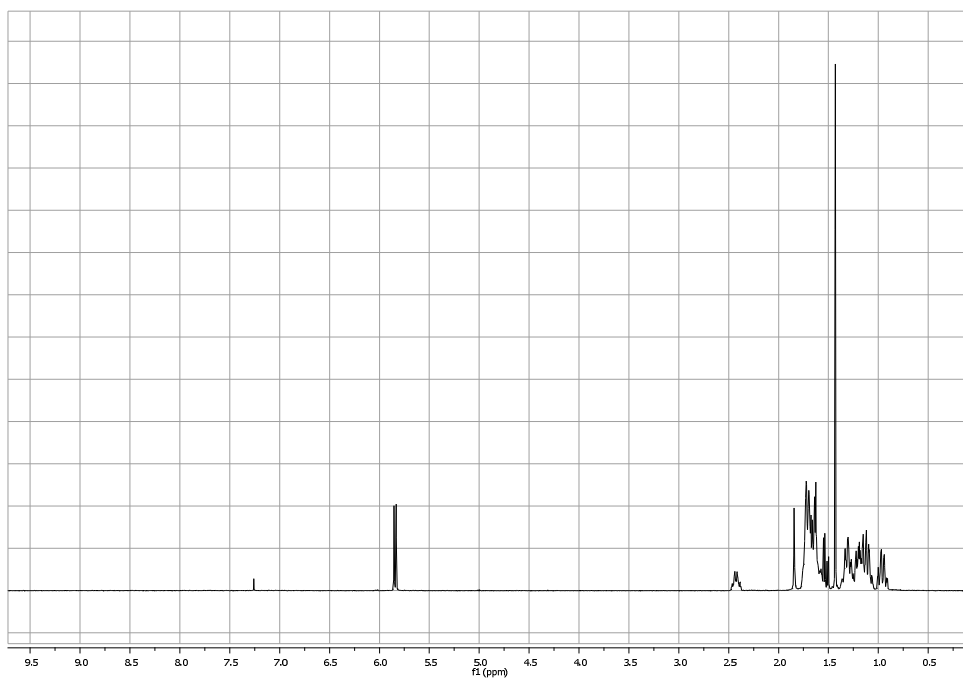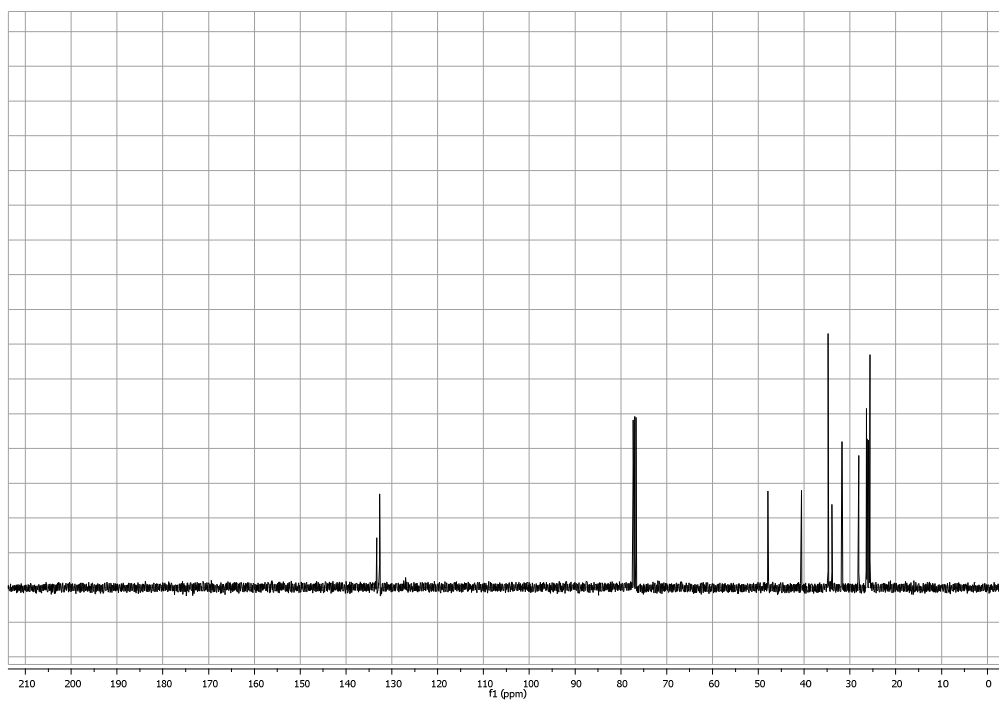

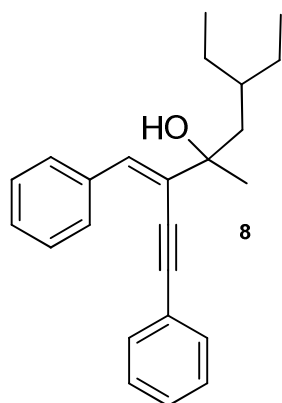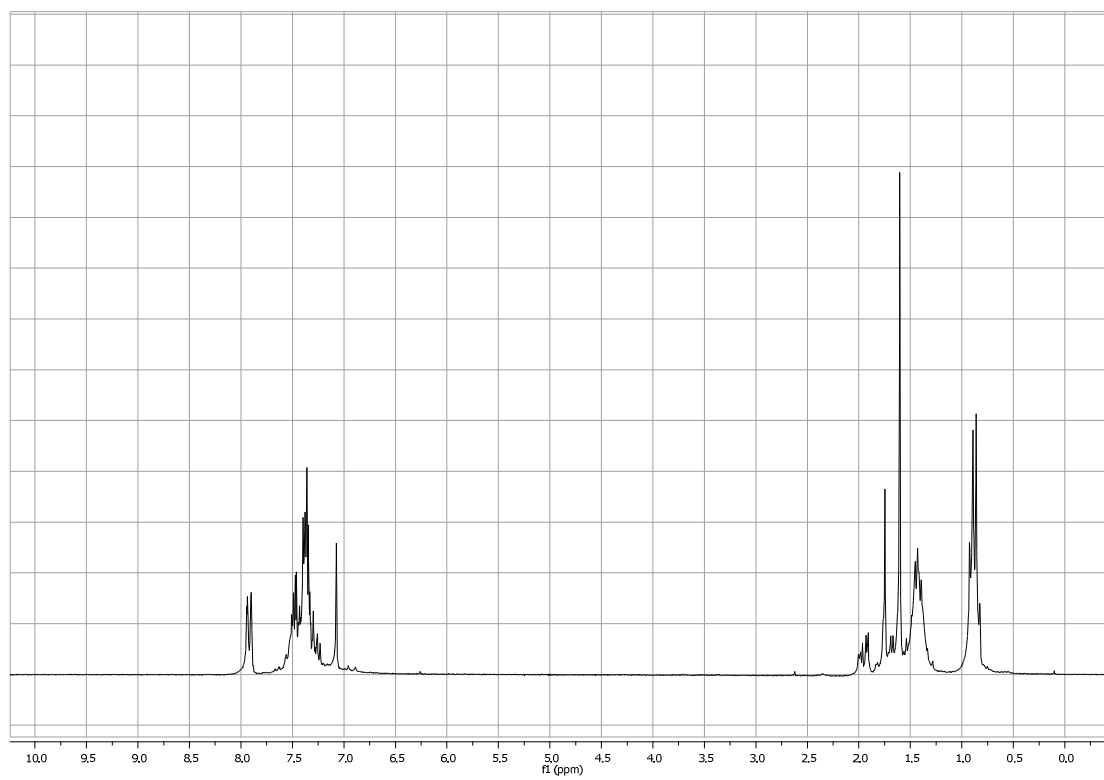

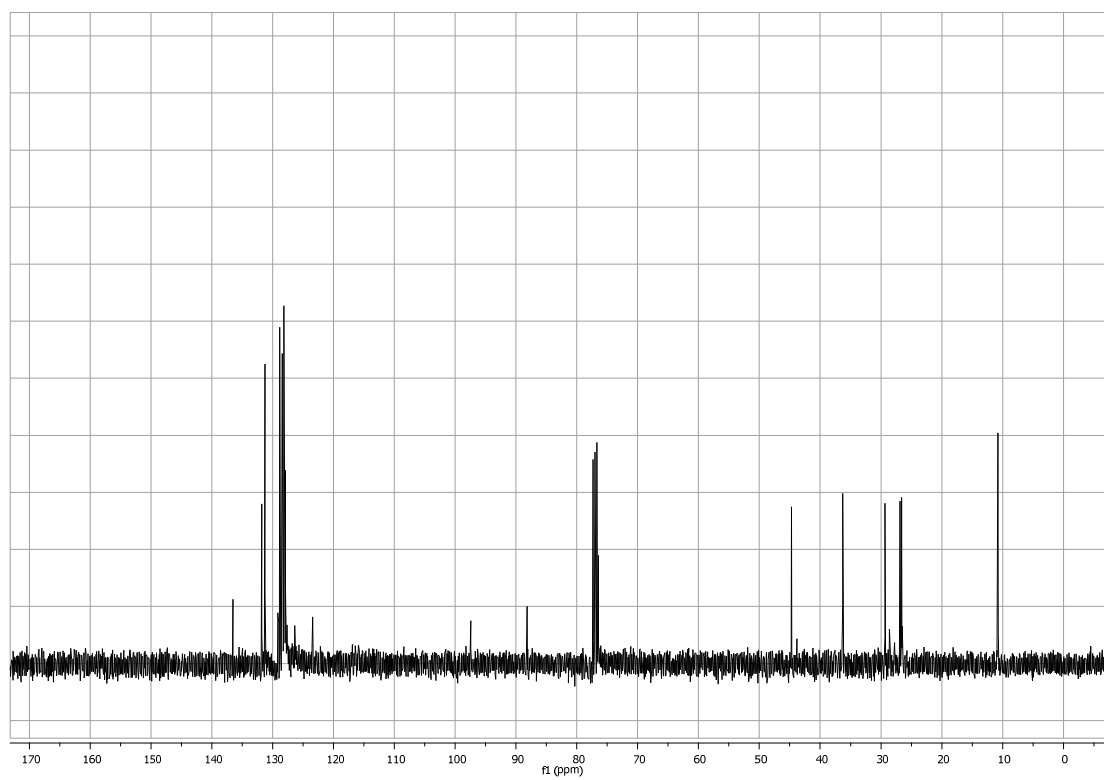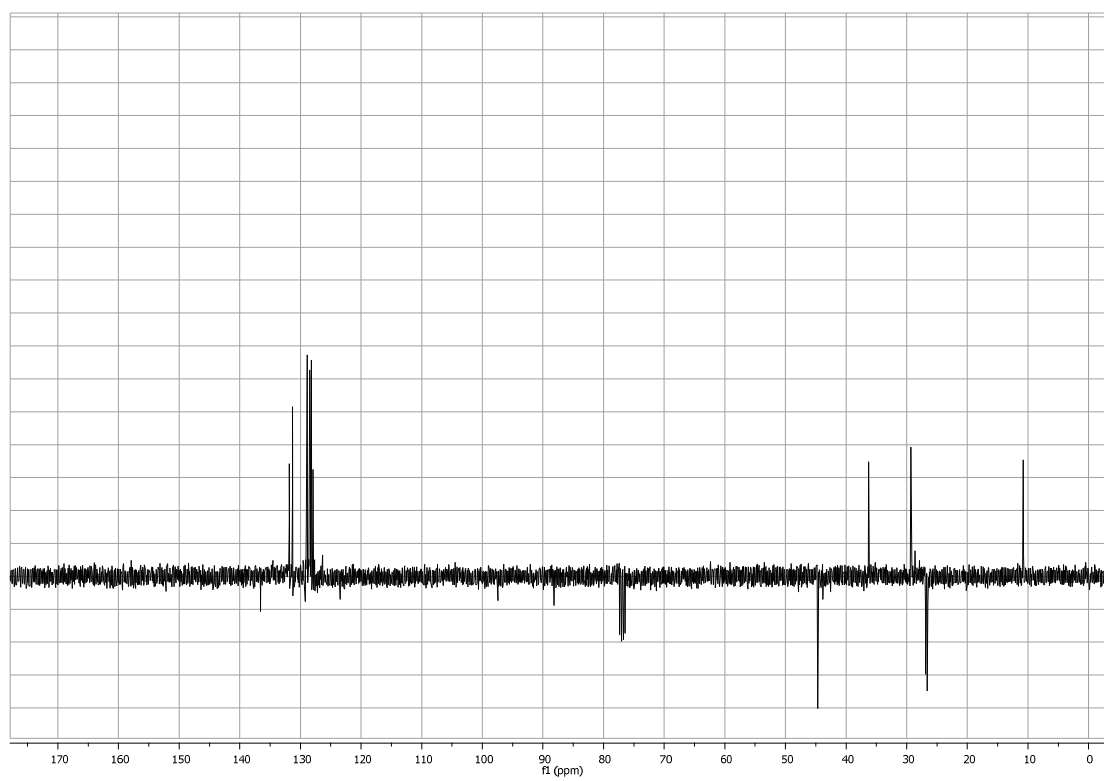



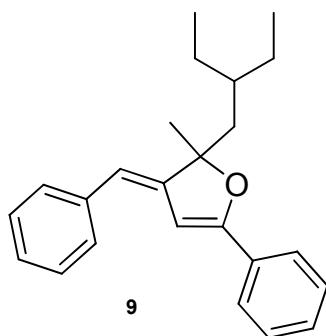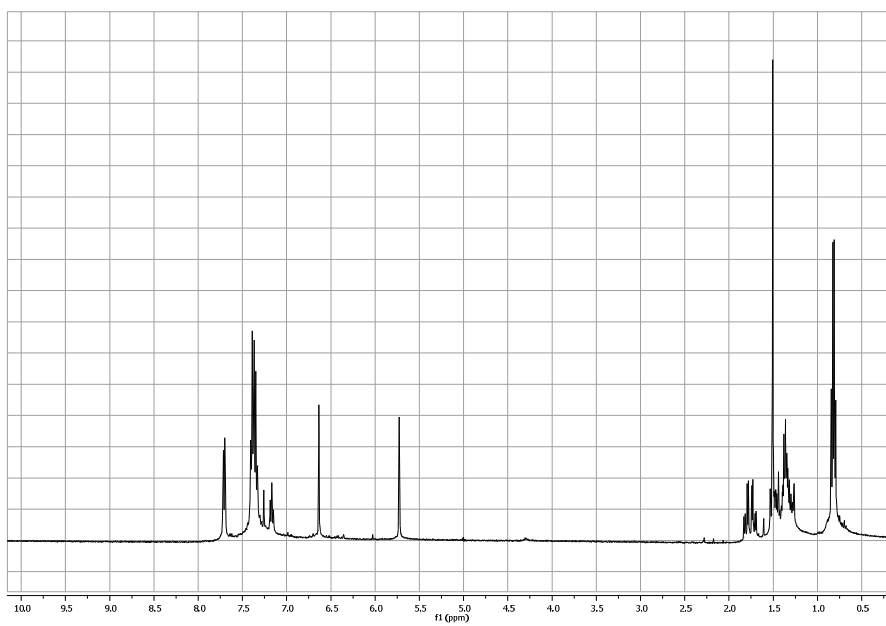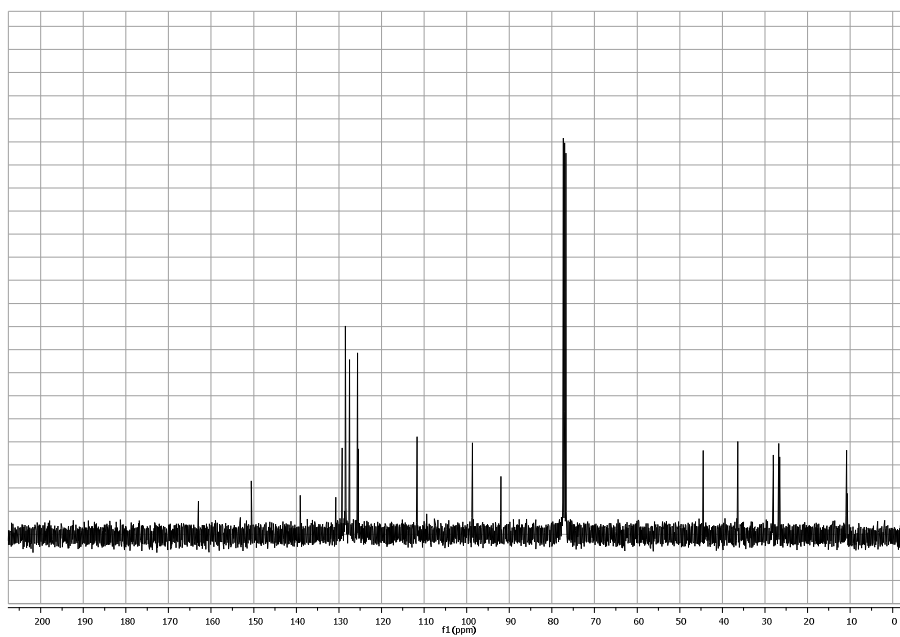

**HMQC** (Heteronuclear Multiple-Quantum Coherence) :

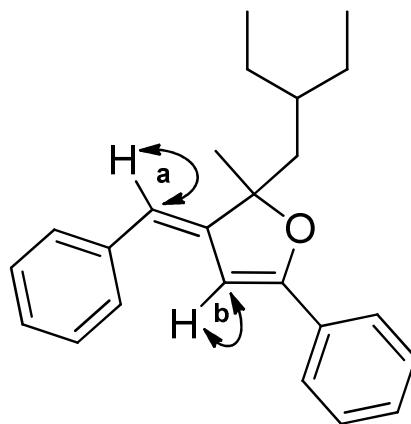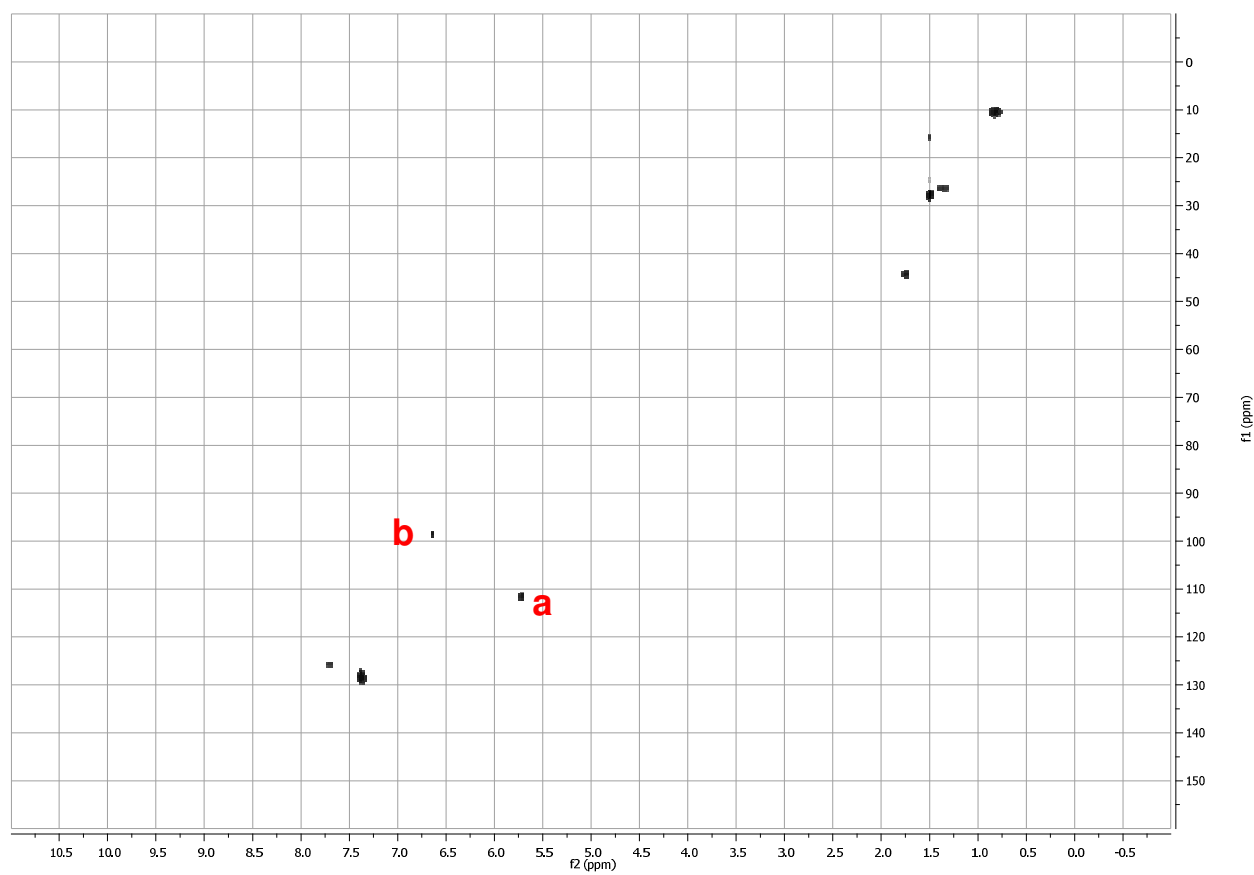

**a** and **b** are the signals observed for the protons attached to that particular carbon.

$^1\text{H}$  NMR &  $^{31}\text{P}$  NMR spectrum of ligand L1 ( $\text{CDCl}_3$ , 500MHz):

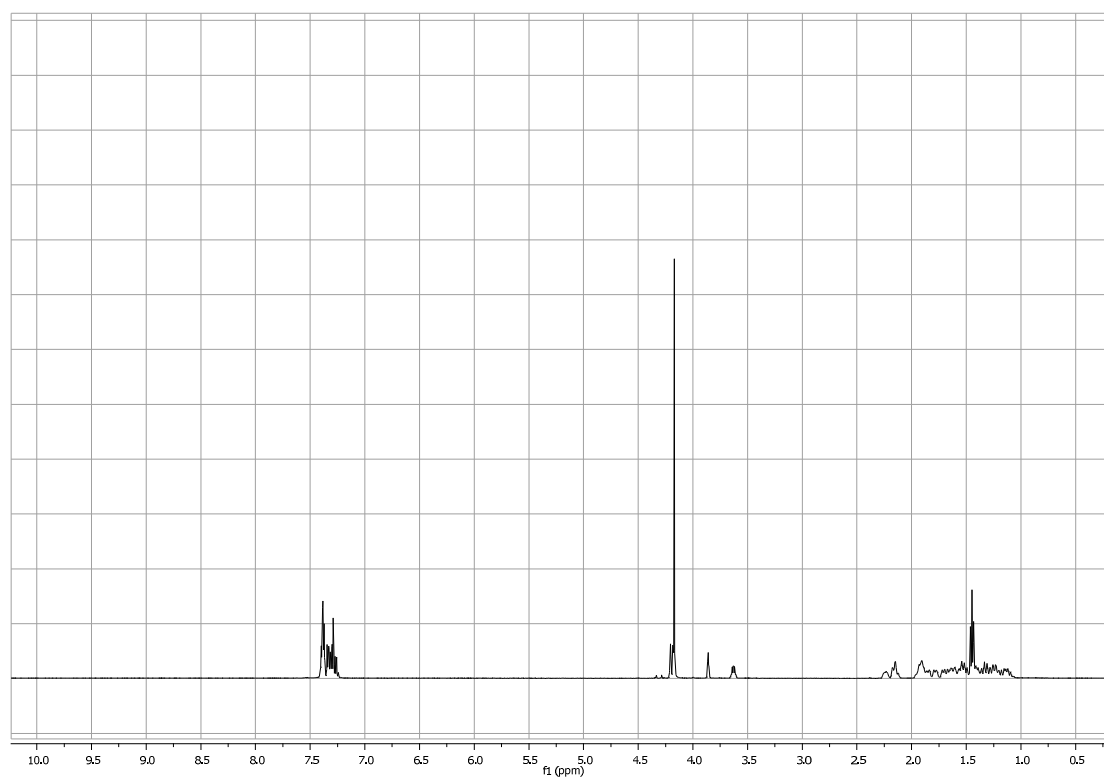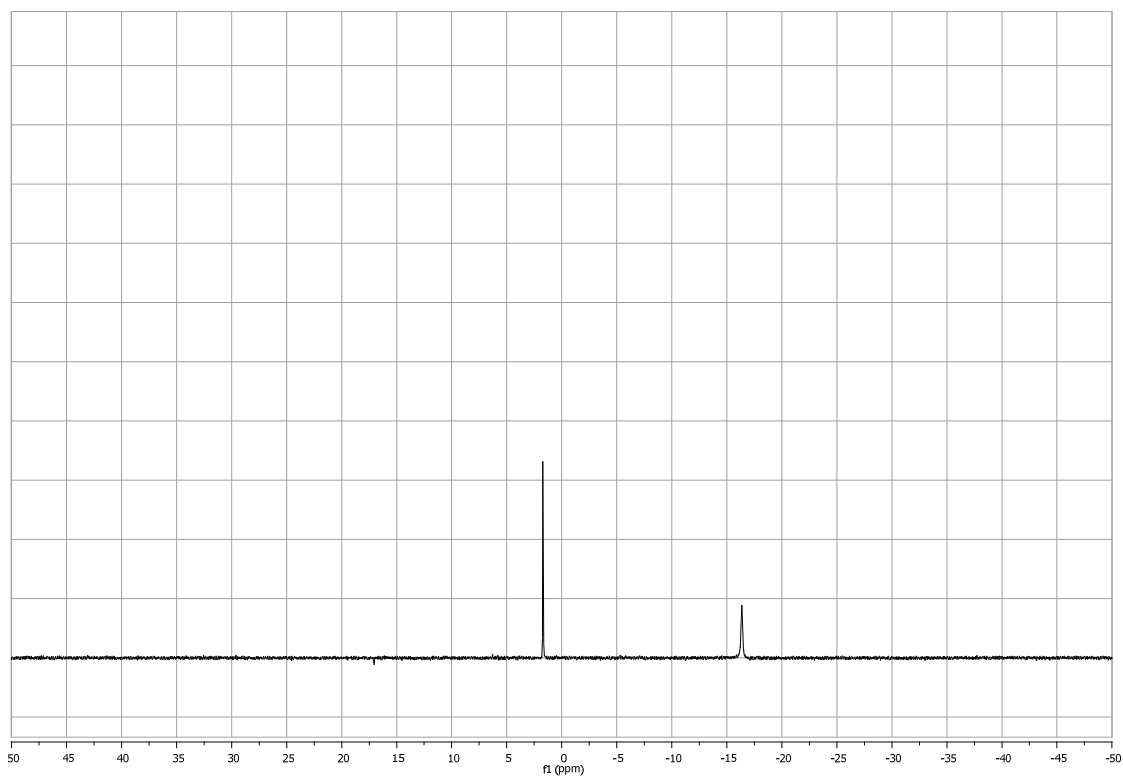

$^1\text{H}$  NMR &  $^{31}\text{P}$  NMR spectrum of  $\text{CuBr}\cdot\text{SMe}_2$  complex of L1 ( $\text{CDCl}_3$ , 500MHz):

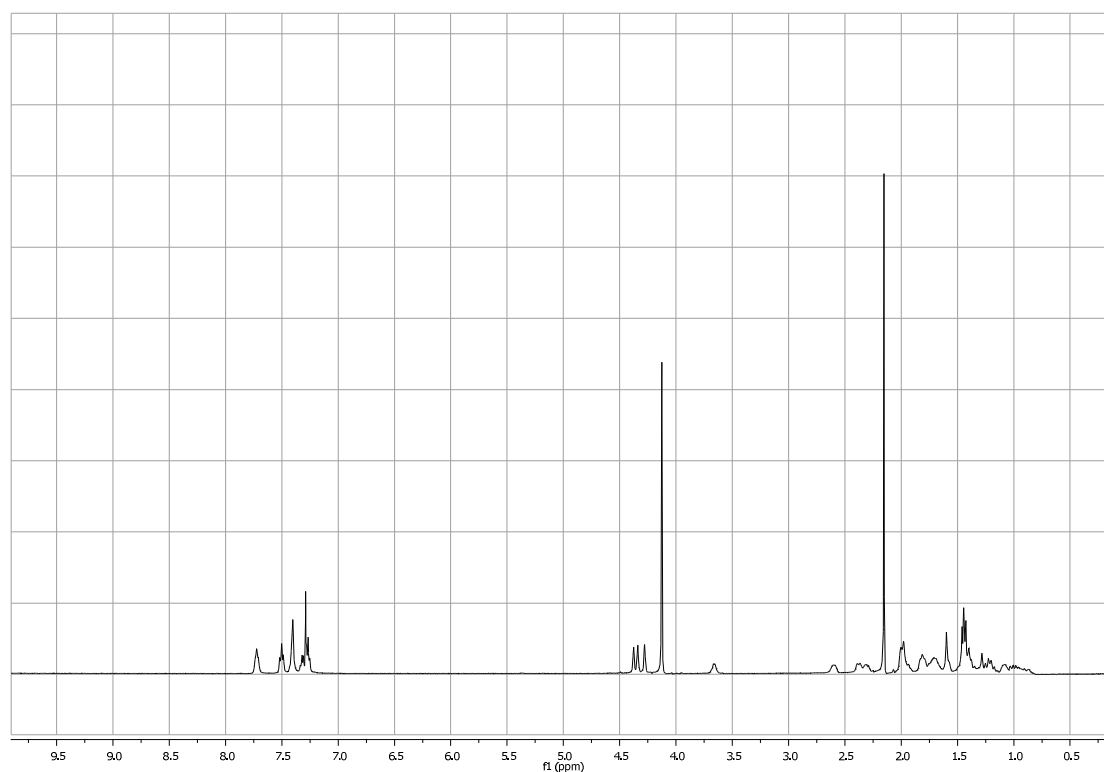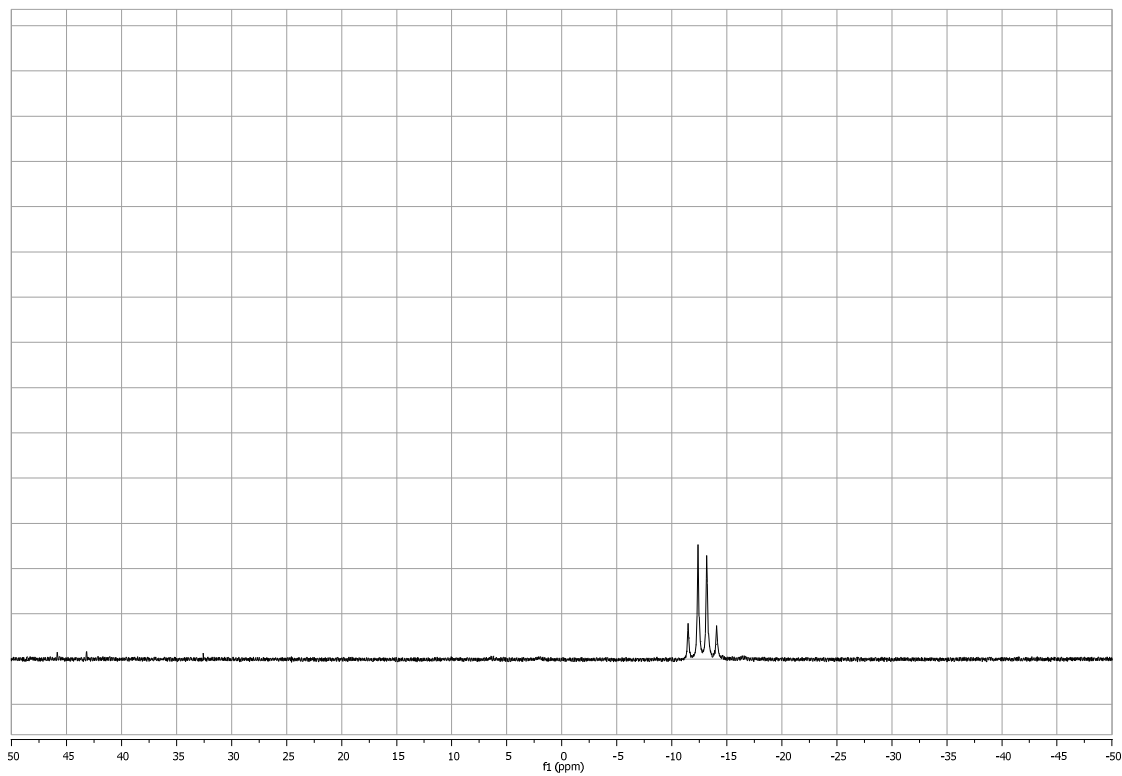

Supplement: c2ob25080b.pdf [file c2ob25080b.pdf]
